# Supplementary material for: Crystal structure, thermal crystal form transformation, desolvation process and desolvation kinetics of two novel solvates of ciclesonide
Source: Royal Society of Chemistry journal article supplement (doi:10.1039/c6ra08351j), 2016-01-01
Supplement: c6ra08351j1.pdf [file c6ra08351j1.pdf]

## Crystal structure, thermal crystal form transformation, desolvation process and desolvation kinetics of two novel solvates of ciclesonide

**Table S1.** Correlation Coefficients  $R^2$  for HCC non-isothermal desolvation kinetics by the solid-state reaction rate model method.

**Table S2.** Correlation Coefficients  $R^2$  for MC non-isothermal desolvation kinetics by the solid-state reaction rate model method.

**Table S3.** Correlation Coefficients for (a) HCC and (b) MC Isothermal Desolvation Kinetics by the solid-state reaction rate Model method.

**Table S1.** Correlation Coefficients  $R^2$  for HCC non-isothermal desolvation kinetics by the solid-state reaction rate model method.

| Model | 1 K/min             | 2 K/min             | 5 K/min | 10 K/min | 20 K/min |
|-------|---------------------|---------------------|---------|----------|----------|
| P2    | 0.9828              | 0.9781              | 0.9817  | 0.956    | 0.9196   |
| P3    | 0.9815              | 0.9766              | 0.9806  | 0.9533   | 0.9141   |
| P4    | 0.9799              | 0.9748              | 0.9796  | 0.9504   | 0.908    |
| A2    | 0.9499              | 0.9502              | 0.9918  | 0.9883   | 0.9793   |
| A3    | 0.9416              | 0.9476              | 0.9915  | 0.9878   | 0.9783   |
| A4    | 0.938               | 0.9447              | 0.9912  | 0.9873   | 0.9772   |
| R2    | 0.9692              | 0.9688              | 0.9903  | 0.9768   | 0.9768   |
| R3    | 0.9627              | 0.964               | 0.9916  | 0.9816   | 0.9656   |
| D1    | 0.9848              | 0.9804              | 0.983   | 0.9597   | 0.927    |
| D2    | 0.9765              | 0.9744              | 0.9881  | 0.9709   | 0.9463   |
| D3    | 0.9639              | 0.965               | 0.9918  | 0.9821   | 0.9665   |
| D4    | 0.9725              | 0.9714              | 0.9898  | 0.9752   | 0.9999   |
| F0/R1 | 0.9842 <sup>b</sup> | 0.9797 <sup>b</sup> | 0.9826  | 0.9585   | 0.9002   |

|    |        |        |                     |                     |                     |
|----|--------|--------|---------------------|---------------------|---------------------|
| F1 | 0.948  | 0.9527 | 0.9921 <sup>b</sup> | 0.9888              | 0.9803              |
| F2 | 0.8939 | 0.9094 | 0.9786              | 0.9922 <sup>b</sup> | 0.9992 <sup>b</sup> |
| F3 | 0.8404 | 0.8654 | 0.954               | 0.9793              | 0.9948              |

<sup>b</sup> Best fit model.

**Table S2.** Correlation Coefficients R<sup>2</sup> for MC non-isothermal desolvation kinetics by the solid-state reaction rate model method.

| Model | 1 K/min             | 2 K/min             | 5 K/min             | 20 K/min            |
|-------|---------------------|---------------------|---------------------|---------------------|
| P2    | 0.9649              | 0.9463              | 0.9724              | 0.9045              |
| P3    | 0.9643              | 0.9453              | 0.9716              | 0.9001              |
| P4    | 0.9637              | 0.9443              | 0.9706              | 0.8954              |
| A2    | 0.9934              | 0.9878              | 0.998               | 0.9692              |
| A3    | 0.9934              | 0.9877              | 0.998               | 0.9681              |
| A4    | 0.9932              | 0.9875              | 0.9979              | 0.967               |
| R2    | 0.9826              | 0.971               | 0.9893              | 0.9432              |
| R3    | 0.987               | 0.9775              | 0.9931              | 0.9531              |
| D1    | 0.9658              | 0.9478              | 0.9737              | 0.9106              |
| D2    | 0.9767              | 0.9626              | 0.984               | 0.9315              |
| D3    | 0.9871              | 0.9777              | 0.9932              | 0.953               |
| D4    | 0.9807              | 0.9683              | 0.9877              | 0.9399              |
| F0/R1 | 0.9655              | 0.9473              | 0.9733              | 0.9086              |
| F1    | 0.9935              | 0.988               | 0.9881              | 0.9701              |
| F2    | 0.9955 <sup>b</sup> | 0.9994 <sup>b</sup> | 0.9933 <sup>b</sup> | 0.9968              |
| F3    | 0.9818              | 0.9917              | 0.9726              | 0.9984 <sup>b</sup> |

<sup>b</sup> Best fit model.

**Table S3.** Correlaion Coefficients for (a) HCC and (b) MC Isothermal Desolvation Kinetics by the solid-state reaction rate Model method.

| Model | HCC(a) |        |        |        | MC(b)  |        |
|-------|--------|--------|--------|--------|--------|--------|
|       | 80°C   | 85°C   | 90°C   | 110°C  | 115°C  | 120°C  |
| P2    | 0.8579 | 0.8616 | 0.9066 | 0.9611 | 0.9586 | 0.9325 |

|                 |                     |                     |                     |                     |                     |                     |
|-----------------|---------------------|---------------------|---------------------|---------------------|---------------------|---------------------|
| P3              | 0.8289              | 0.8337              | 0.8835              | 0.9432              | 0.9404              | 0.9104              |
| P4              | 0.8132              | 0.8186              | 0.8705              | 0.9327              | 0.9298              | 0.8979              |
| A2 <sup>b</sup> | 0.9743              | 0.9745              | 0.9862              | 0.9989              | 0.9993              | 0.9966              |
| A3              | 0.9698              | 0.9525              | 0.9723              | 0.9985              | 0.9955              | 0.9865              |
| A4              | 0.9695              | 0.9386              | 0.9626              | 0.9983              | 0.9905              | 0.9783              |
| R2              | 0.9801              | 0.9802              | 0.9884              | 0.9981 <sup>b</sup> | 0.9986 <sup>b</sup> | 0.9996 <sup>b</sup> |
| R3              | 0.9910 <sup>b</sup> | 0.9910 <sup>b</sup> | 0.9933 <sup>b</sup> | 0.9923              | 0.9935              | 0.9993              |
| D1              | 0.9879              | 0.9875              | 0.9871              | 0.9858              | 0.9872              | 0.9964              |
| D2              | 0.9992              | 0.9987              | 0.9869              | 0.9587              | 0.9621              | 0.9819              |
| D3              | 0.9845              | 0.9852              | 0.9666              | 0.9011              | 0.9070              | 0.9378              |
| D4              | 0.9977              | 0.9977              | 0.9825              | 0.9417              | 0.9460              | 0.9699              |
| F0/R1           | 0.9247              | 0.9263              | 0.9552              | 0.9929              | 0.9914              | 0.9776              |
| F1              | 0.9988              | 0.9996              | 0.9927              | 0.9678              | 0.9706              | 0.9856              |
| F2              | 0.918               | 0.9229              | 0.9106              | 0.8060              | 0.8141              | 0.8498              |
| F3              | 0.7619              | 0.7655              | 0.7599              | 0.6036              | 0.6166              | 0.659               |

<sup>b</sup> Best fit model.
